# Supplementary material
Source: publisher site journal article supplement (https://www.dovepress.com/get_supplementary_file.php?f=425189.docx)

**Supplemental Figure 1**. Cumulative incidence function (CIF) curves of cancer mortality according to A) different glucose metabolism status; B) different SII levels; C) both status of SII levels and glucose metabolism
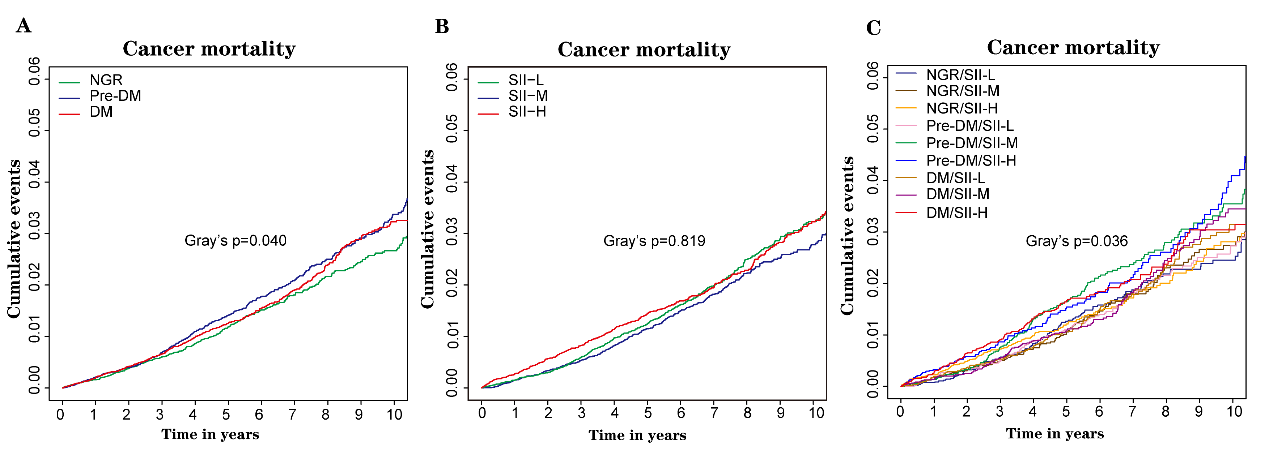

Supplement: Supplementary file 1 [file get_supplementary_file.php]
